# Supplementary material for: Euphorbia factor L1 suppresses breast cancer liver metastasis via DDR1-mediated immune infiltration
Source: publisher site journal article supplement (doi:10.18632/aging.205030), 2023-09-14
Supplement: Supplementary file [file aging-v15i17-205030-supplementary-material-SD2.pdf]

**SUPPLEMENTARY FIGURES**

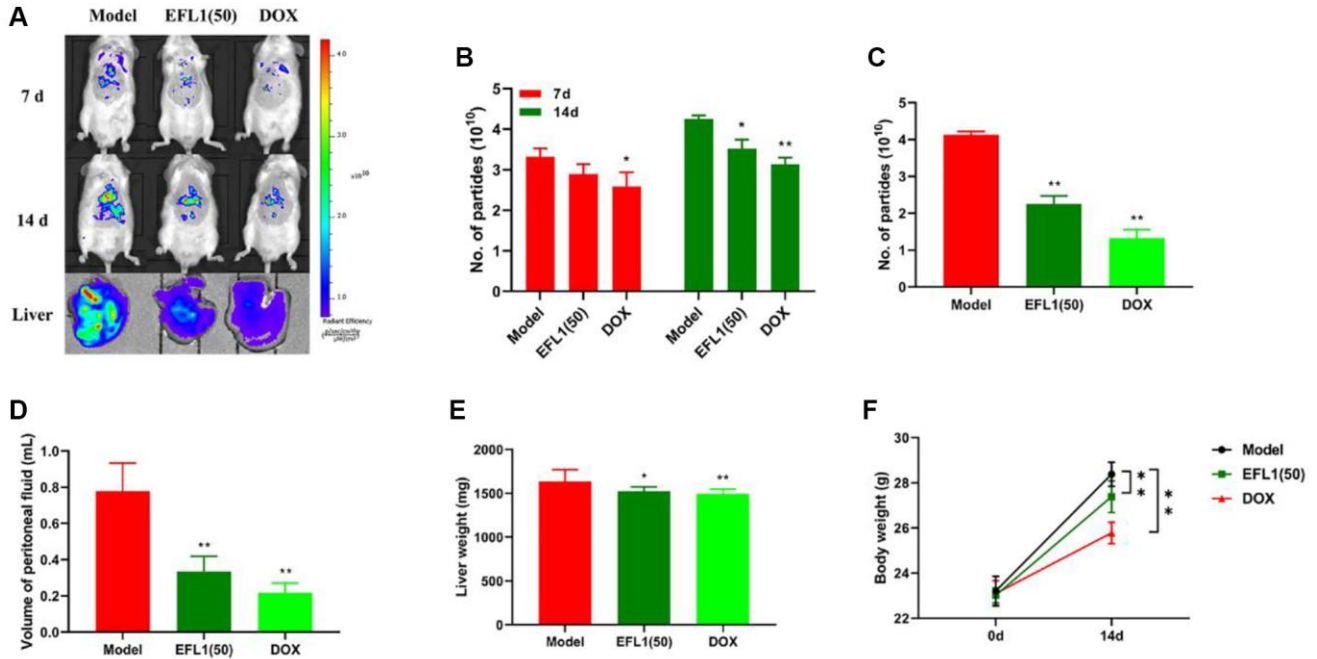

**Supplementary Figure 1. EFL1 alleviates liver metastasis of *in situ* breast cancer.** Treatment with EFL1 or DOX for 2 weeks significantly decreased metastatic luciferase signals (A–C,  $n = 3$ ), peritoneal fluid (D,  $n = 9$ ), liver weight (E,  $n = 9$ ) and body weight (F,  $n = 9$ ) of mice with 4T1-LUC breast cancer. Data were compared using two-way ANOVA with Tukey’s post hoc (B, F) or one-way ANOVA with Dunnett’s post hoc (C–E). \*\* $P < 0.01$ . Abbreviations: ns: not significant. \* $P < 0.05$ , \*\* $P < 0.01$  vs. Model.

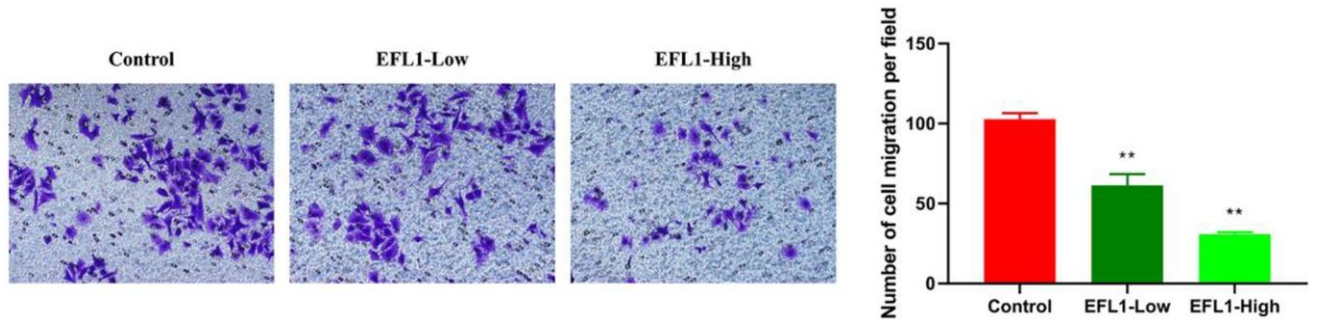

**Supplementary Figure 2. EFL1 decreases the migration of 4T1 cells co-cultured with CD3+ T cells.** 4T1 cells were co-cultured with CD3+ T cells for 48 h with or without EFL1-containing serum. Cell mitigation was observed under a microscope. Treatment with EFL1-containing serum greatly decreased the number of mitigating 4T1 cells.  $n = 3$ . Data were compared using one-way ANOVA with Dunnett’s post hoc. \*\* $P < 0.01$  vs. Control.
